# Supplementary material
Source: PubMed Central journal article supplement (PMC7955913)
Supplement: mmc1.pdf [file mmc1.pdf]

1 **Supplementary Data**

2

3 **Genetic Modification to Design a Stable Yeast-expressed Recombinant SARS-CoV-2 Receptor Binding**  
4 **Domain as a COVID-19 Vaccine Candidate**

5

6 Wen-Hsiang Chen<sup>ab</sup>, Junfei Wei<sup>a</sup>, Rakhi Tyagi Kundu<sup>a</sup>, Rakesh Adhikari<sup>a</sup>, Zhuyun Liu<sup>a</sup>, Jungsoon Lee<sup>a</sup>, Leroy  
7 Versteeg<sup>a</sup>, Cristina Poveda<sup>a</sup>, Brian Keegan<sup>a</sup>, Maria Jose Villar<sup>a</sup>, Ana C. de Araujo Leao<sup>a</sup>, Joanne Altieri Rivera<sup>a</sup>  
8 Portia M. Gillespie<sup>a</sup>, Jeroen Pollet<sup>ab</sup>, Ulrich Strych<sup>ab</sup>, Bin Zhan<sup>ab</sup>, Peter Hotez<sup>abcd\*</sup>, Maria Elena Bottazzi<sup>abcd\*</sup>

9

10 <sup>a</sup> Texas Children's Hospital Center for Vaccine Development, Houston, TX, USA

11 <sup>b</sup> Departments of Pediatrics and Molecular Virology & Microbiology; National School of Tropical Medicine;  
12 Baylor College of Medicine, Houston, TX, USA

13 <sup>c</sup> Department of Biology, Baylor University, Waco, TX, USA

14 <sup>d</sup> James A. Baker III Institute for Public Policy, Rice University, Houston, TX, USA

15

16 \*Maria Elena Bottazzi [bottazzi@bcm.edu](mailto:bottazzi@bcm.edu), 1 Baylor Plaza, Houston TX 77030

17 \*Peter J Hotez [hotez@bcm.edu](mailto:hotez@bcm.edu), 1 Baylor Plaza, Houston TX 77030

18

19

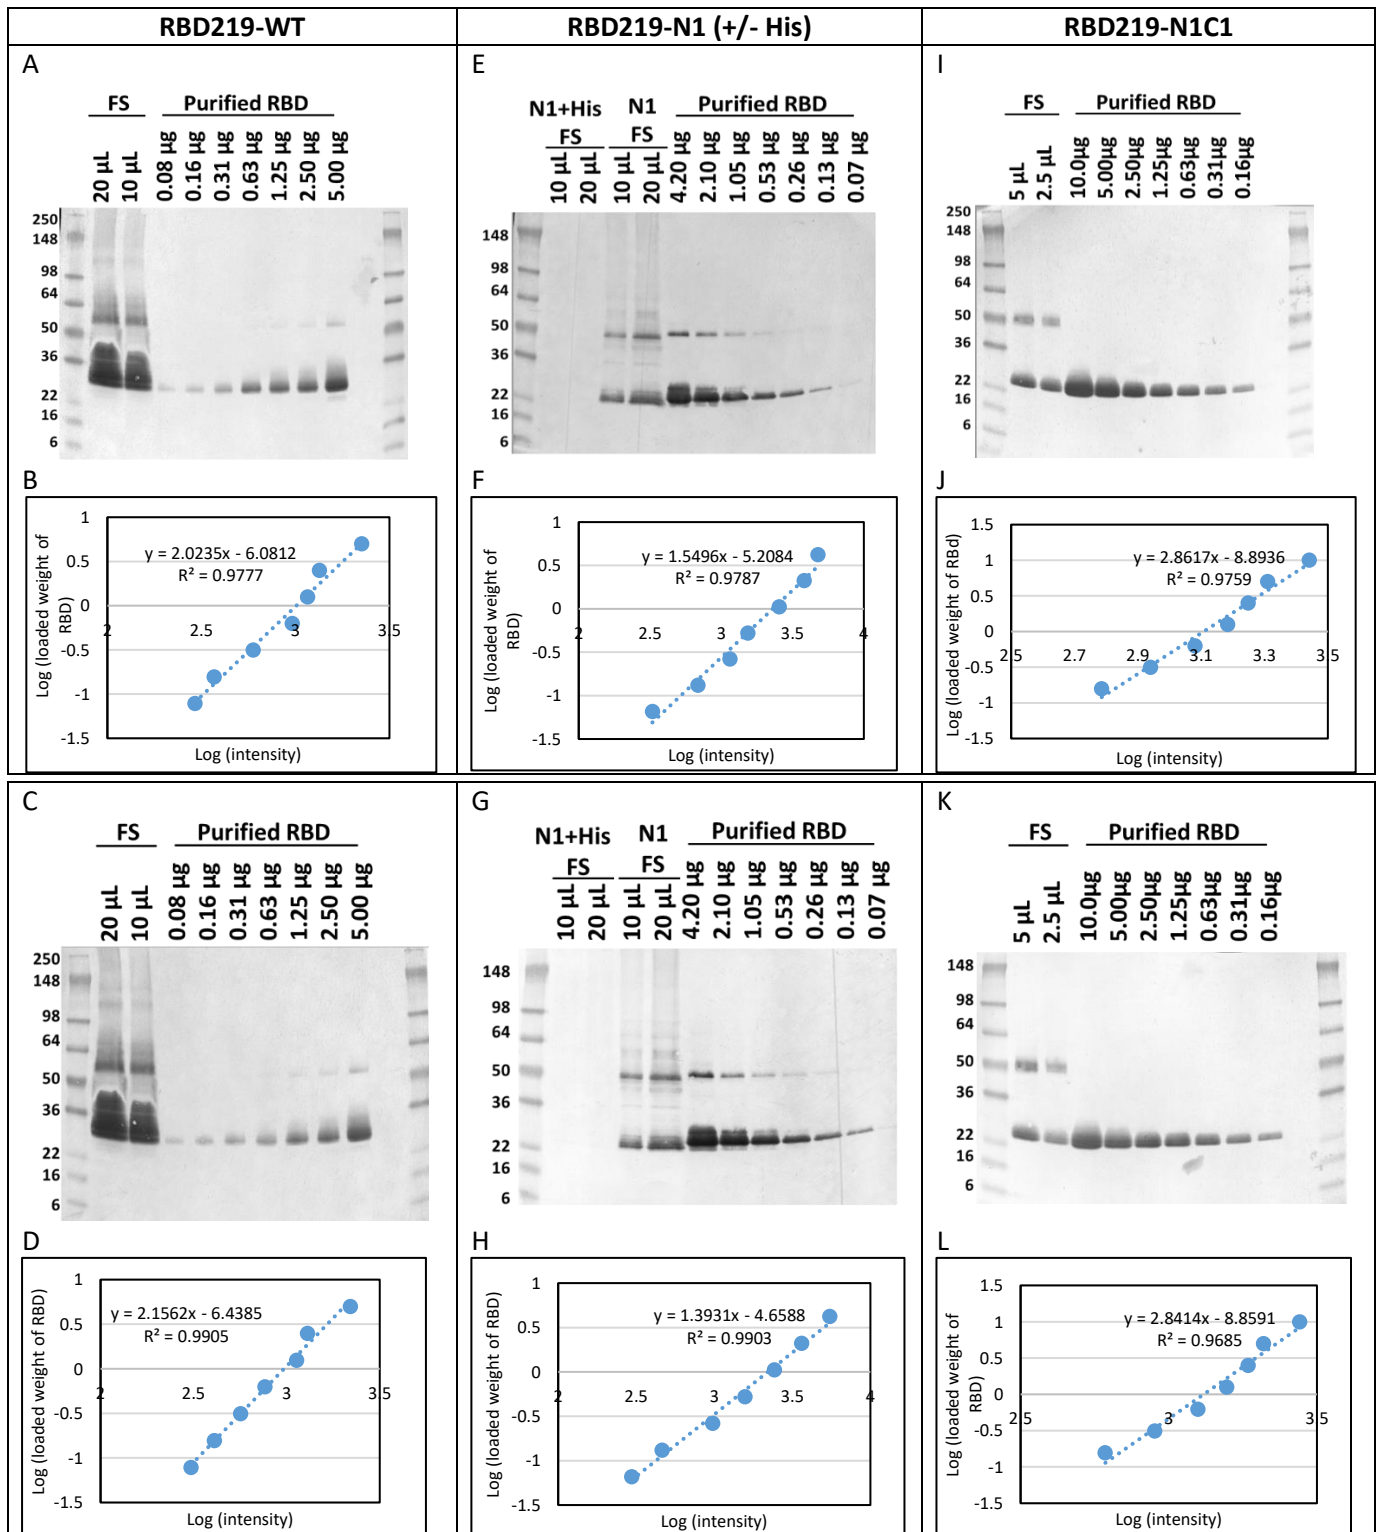

20 **Figure S1** Western blot of RBD219-WT fermentation supernatant and purified RBD219-WT (A, C) and the  
 21 standard curve generated using the purified RBD219-WT (B, D). Western blot of RBD219-N1 and N1+His  
 22 fermentation supernatant and purified RBD219-N1+His (E, G) and the standard curve generated using the  
 23 purified RBD219-N1+His (F, H). Western blot of RBD219-N1C1 fermentation supernatant and purified  
 24 RBD219-N1C1 (I, K) and the standard curve generated using the purified RBD219-N1C1 (J, L)

25

26

27

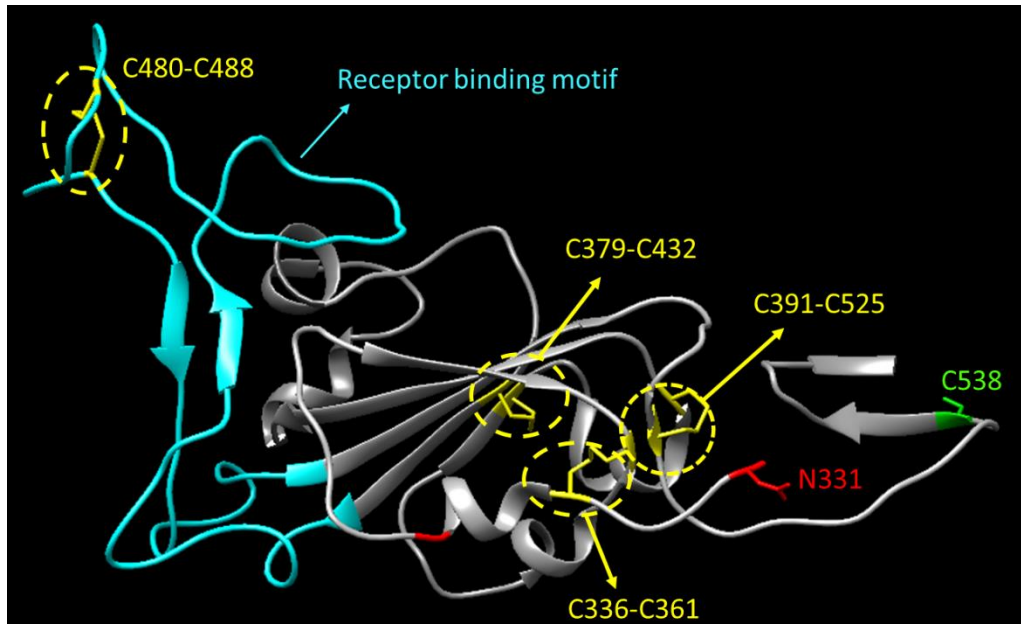

28

29 **Figure S2.** The structure of RBD219-WT is extracted from SARS-CoV-2 Spike protein (PDB ID: 6XEY) using  
30 Chimera 1.14. The four disulfide bond formation at C336/C361, C379/C432, C391/525, and C480/488  
31 are highlighted in yellow and the free cysteine is highlighted in green. The two glycosylation sites N331  
32 and N343 are highlighted in red. The receptor-binding motif (RBM) is highlighted in cyan.

33

34

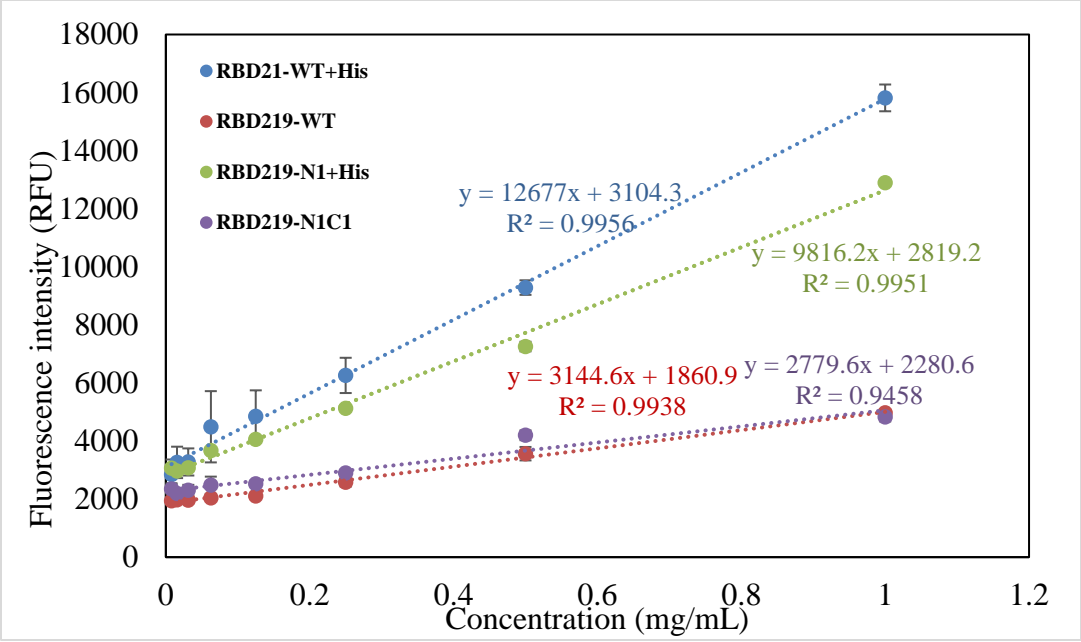

35

36 **Figure S3** Fluorescence intensity vs. concentration plot for different RBD variants
